# Supplementary material for: The structural basis for CD36 binding by the malaria parasite
Source: PubMed Central journal article supplement (PMC5052687; doi:10.1038/ncomms12837), 2016-09-26
Supplement: ncomms12837-s1.pdf [file ncomms12837-s1.pdf]

1  
2

## Supplementary Information

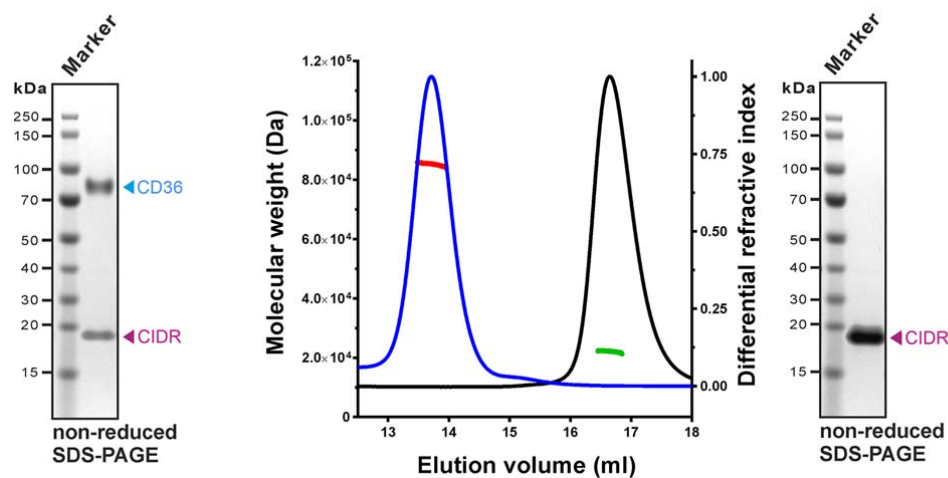

3

### 4 **Supplementary Figure 1: Biophysical analysis of the CD36:CIDR $\alpha$ 2.8 complex**

5 Analysis of the formation of a 1:1 complex of CD36 bound to the MCvar1  
6 CIDR $\alpha$ 2.8 domain by SEC-MALLS.

7

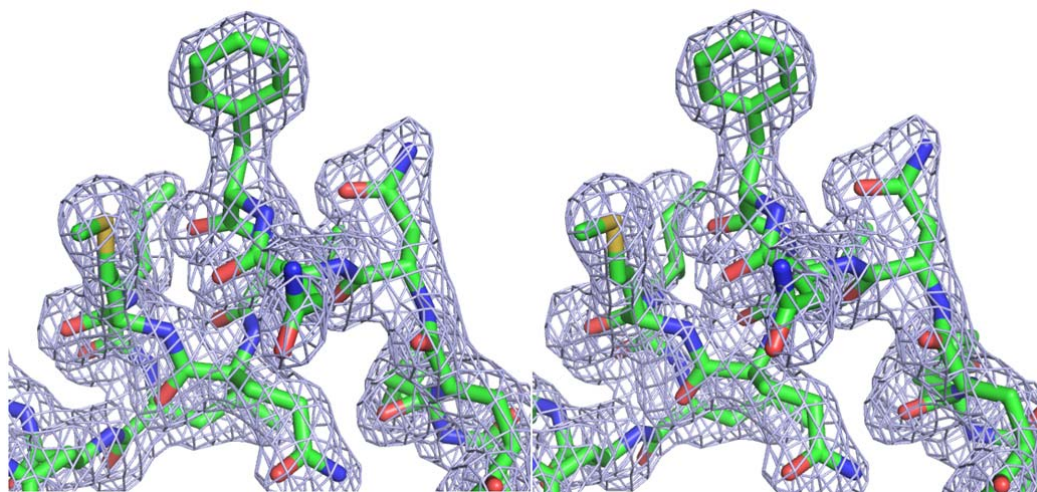

8

### 9 **Supplementary Figure 2: Stereo image of electron density**

10 A stereo image of the electron density for residues 148-160 of CD36. This is  
11 representative of the quality of electron density throughout the complex and  
12 contains the important residue, F153, which lies at the interface with the MC179  
13 CIDR $\alpha$ 2.8 domain.

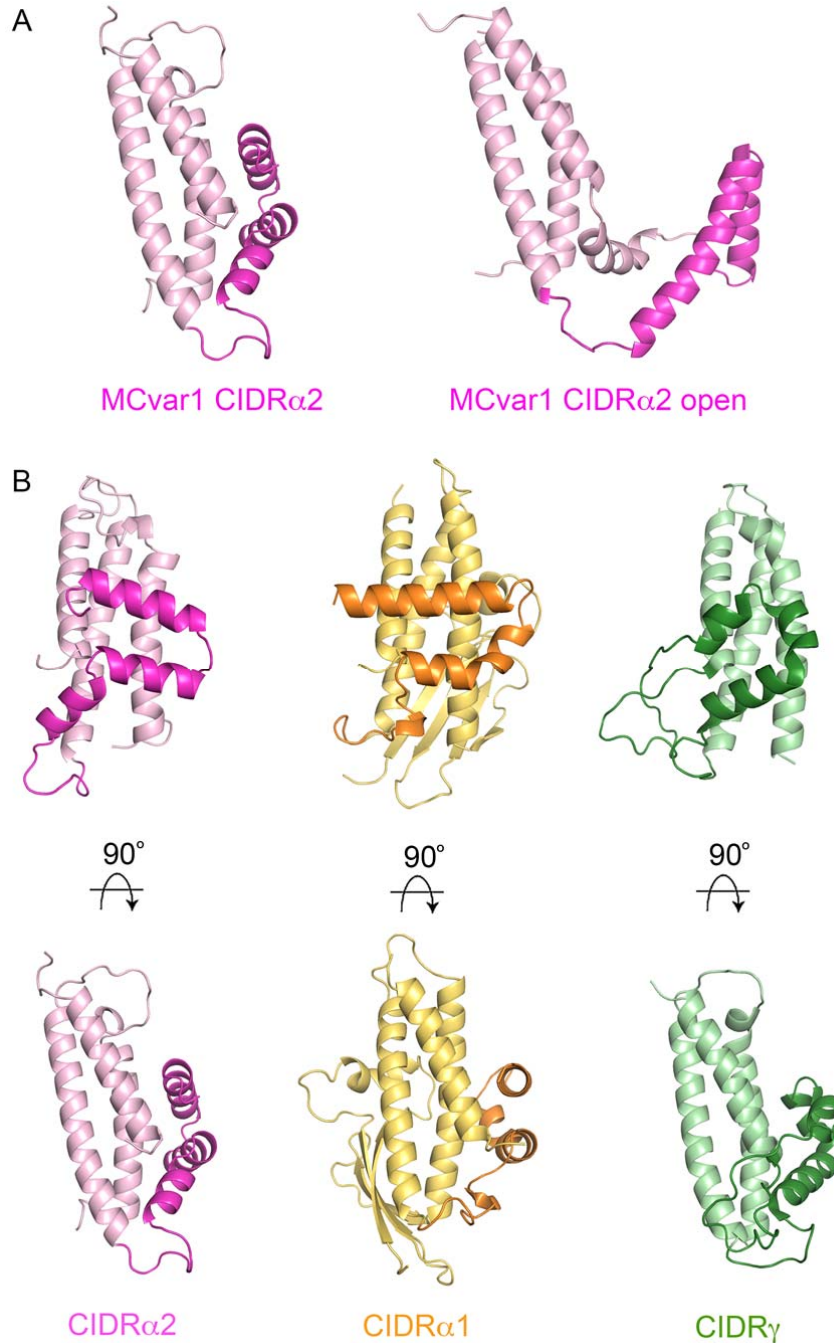

14

15 **Supplementary Figure 3: Structural comparison of CIDR $\alpha$  domain structures**

16 **A.** The structure of the MCvar1 CIDR $\alpha$ 2.8 domain determined in this study in  
 17 comparison with the previously determined 'open' conformation of the MCvar1  
 18 CIDR $\alpha$  domain, obtained in a pH 4.2 crystallisation condition (pdb:3C64). **B.**  
 19 Comparison of the MCvar1 CIDR $\alpha$ 2.8 structure, determined in this study with  
 20 previous CIDR $\alpha$ 1 (pdb:4V3D) and CIDR $\gamma$  (pdb:2YK0) structures reveals these to  
 21 adopt a compact structure with a core three  $\alpha$ -helical bundle and the insertion  
 22 linking the second and third helices packing against the rest of the domain.

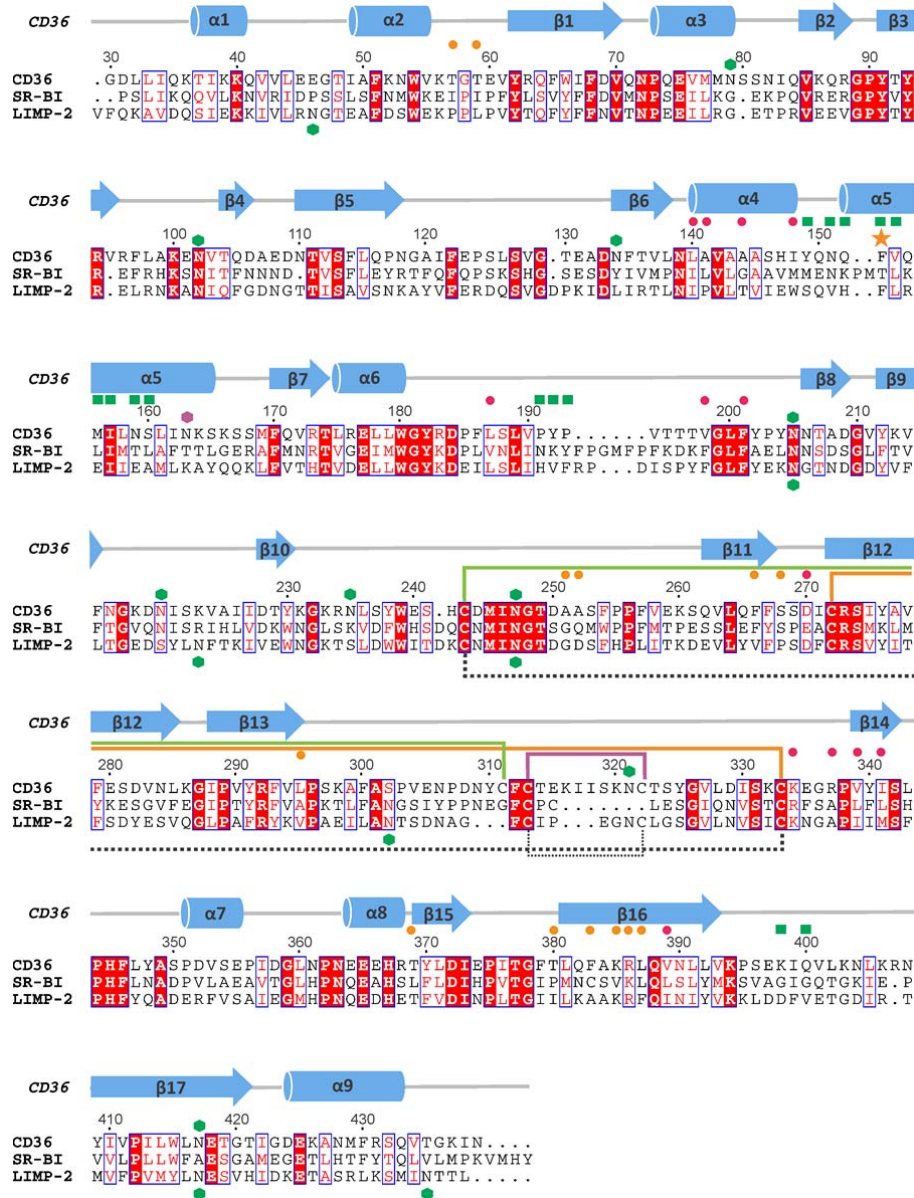

23

24 **Supplementary Figure 4: Analysis of CD36 and its homologues**

25 An alignment of the sequence of CD36 with those of its homologues SR-BI  
 26 and LIMP2. Above the alignment is the secondary structure of CD36, derived from  
 27 the crystal structure. Orange and pink circles show residues that interact with  
 28 the two fatty acids while green squares show those that interact with the MCvar1  
 29 CIDR $\alpha$ 2.8 domain. Orange, green and purple lines show the positions of the  
 30 disulphide bonds of CD36; and dotted lines show the disulphide bonds of LIMP-  
 31 2. Green hexagons show the positions of N-linked glycans on CD36 (above the  
 32 sequence) and LIMP-2 (below the sequence) while the purple hexagon shows a  
 33 position predicted to be glycosylated on CD36 but without a glycan.

34

35

36

37

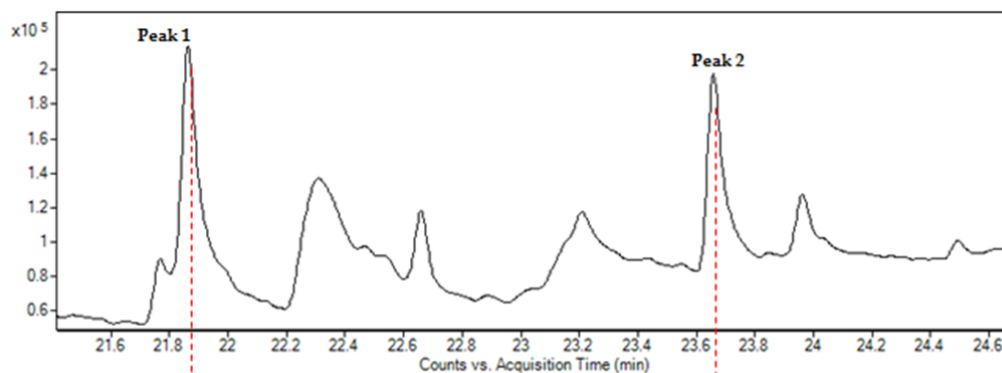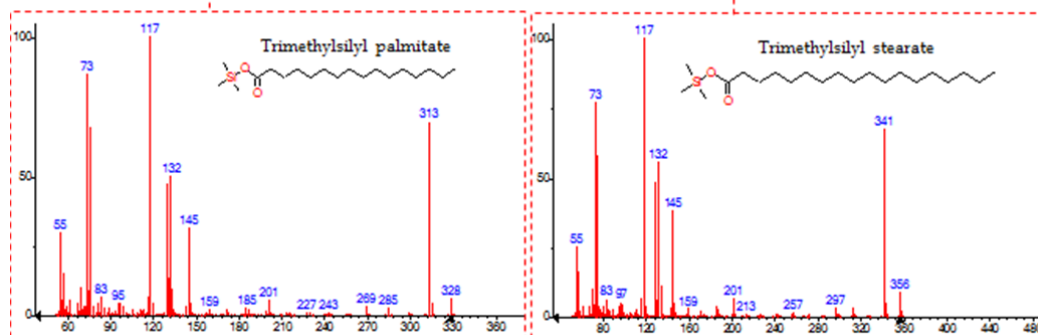

38

39 **Supplementary Figure 5: Fatty acid identification by mass spectrometry**

40 Fatty acids were chloroform extracted from the protein used for crystallisation  
41 and were converted to their corresponding trimethylsilyl esters and analysed by  
42 GC/MS. Masses were consistent with the identification of the most prevalent  
43 species as palmitic acid and stearic acid.

44

45

46

47

48

49

50

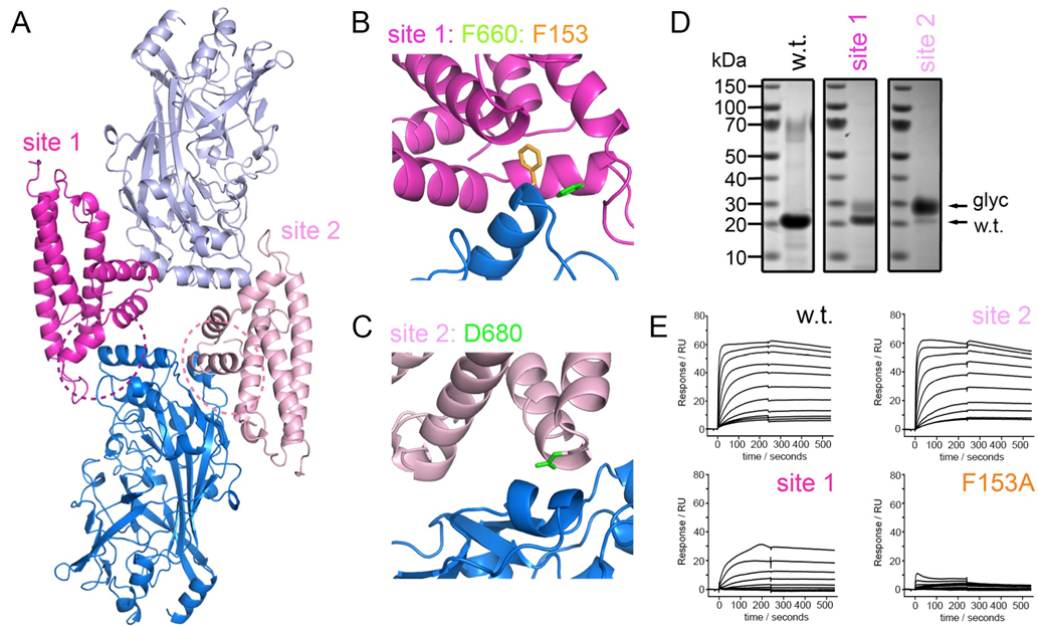

51

52

### 53 **Supplementary Figure 6: Analysis of crystal packing**

54 **A.** In crystals of CD36 bound to the MCvar1 CIDR $\alpha$ 2.8 domain, two CIDR $\alpha$ 2.8  
55 domains (dark and light pink) interact with each CD36 (blue). **B.** A close up of  
56 site 1 with CD36 residue F153 in orange and CIDR $\alpha$ 2.8 residue F660 in green. **C.**  
57 A close up of site 2 with CIDR $\alpha$ 2.8 residue D680 in green. **D.** The expression of  
58 mutant forms of the CIDR $\alpha$ 2.8 domain with N-linked glycosylation sites  
59 introduced in site 1 (F660N:Q662T) and site 2 (D680N:N682T). A small fraction  
60 of the site 1 mutant was glycosylated while the majority of the site 2 mutant was  
61 glycosylated. **E.** Surface plasmon resonance showing binding of CD36 and CIDR $\alpha$   
62 mutants. Introduction of a partial site 1 glycan and the F153A mutation of CD36  
63 both disrupted binding, while a glycan inserted in site 2 did not affect binding.  
64 This confirms that site 1 represents the interaction that occurs in solution while  
65 site 2 represents a crystal contact.

66

67

68

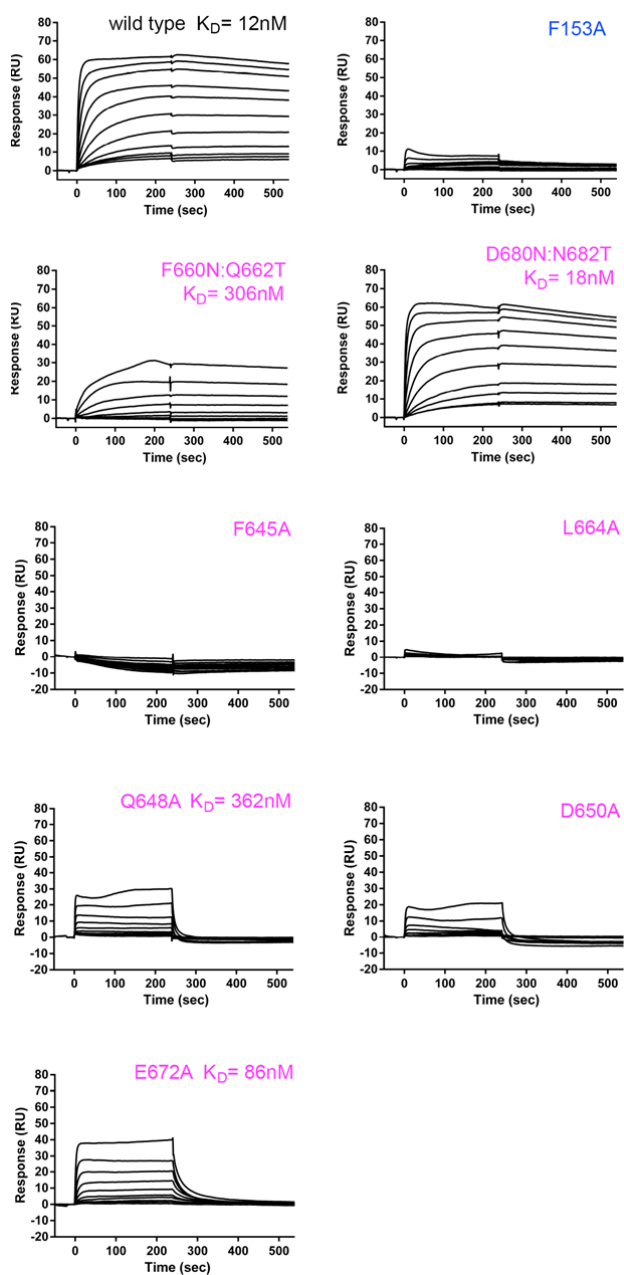

69

70 **Supplementary Figure 7: Mutagenesis to assess the role of regions of the**  
 71 **CIDR $\alpha$  domain in CD36 binding**

72 Surface plasmon resonance analysis of the binding of MCvar1 CIDR $\alpha$ 2.8 to CD36  
 73 and the effect of mutations on the interaction. The F660N:Q662T and  
 74 D680N:N682T mutants introduce glycosylation sites into potential binding  
 75 interfaces. The F153A mutation of CD36 and the F645A and L664 mutations of  
 76 MCvar1 CIDR $\alpha$ 2.8 disrupted the hydrophobic core of the binding interface. The  
 77 Q643A, D650A and E672A mutations disrupted additional hydrogen bonds  
 78 formed between CD36 and MCvar1 CIDR $\alpha$ 2.8. Each set of binding curves shows a  
 79 series of two-fold dilutions from a starting concentration of 400nM.

80

81

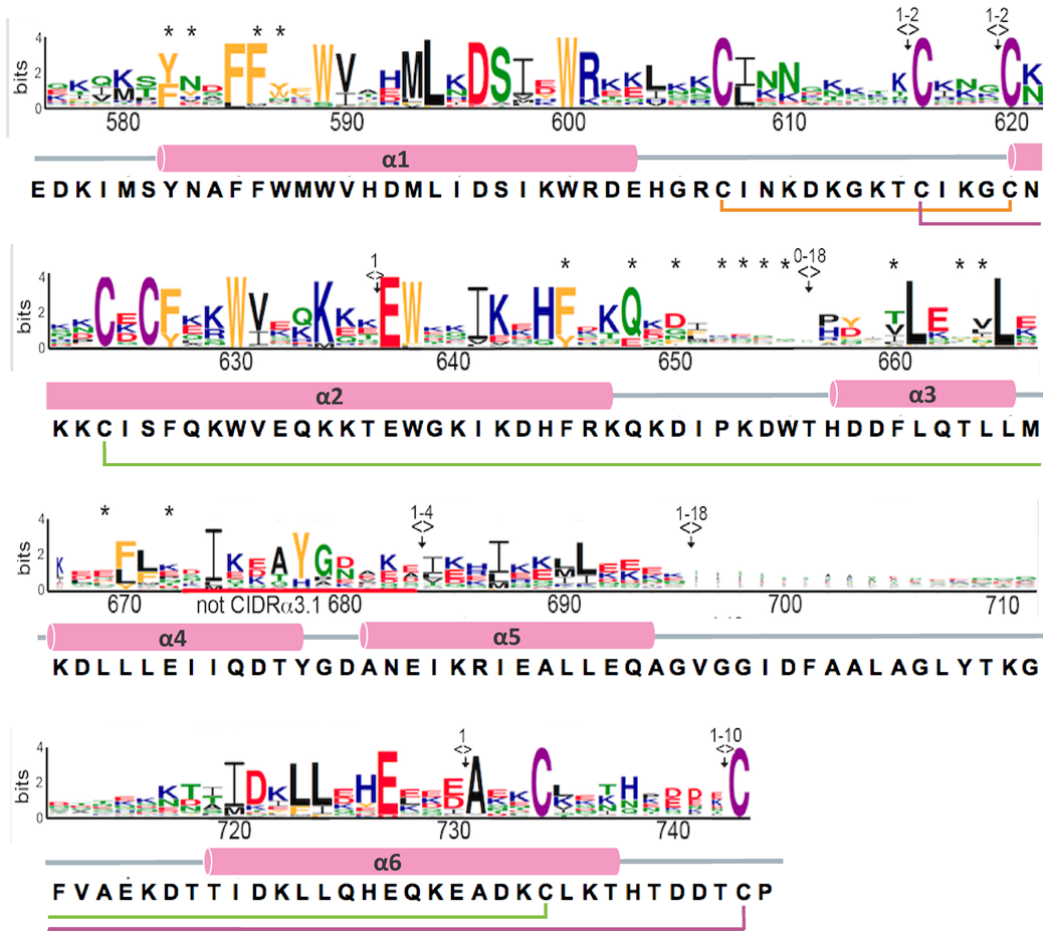

82

83 **Supplementary Figure 8: Conservation across the CD36-binding CIDRα2-6**  
 84 **domains**

85 Sequences of 2386 CIDRα2-6 domains were aligned and a sequence logo  
 86 generated of residues equivalent to those found in the MCvar1 CIDRα2.8 domain.  
 87 Deletions (><) and insertions (<>) are indicated and underneath the sequence is  
 88 a representation of the secondary structure. The green, purple and orange lines  
 89 show the positions of disulphide bonds and the stars above the logo denote the  
 90 residues that directly interact with CD36.

91

92

93

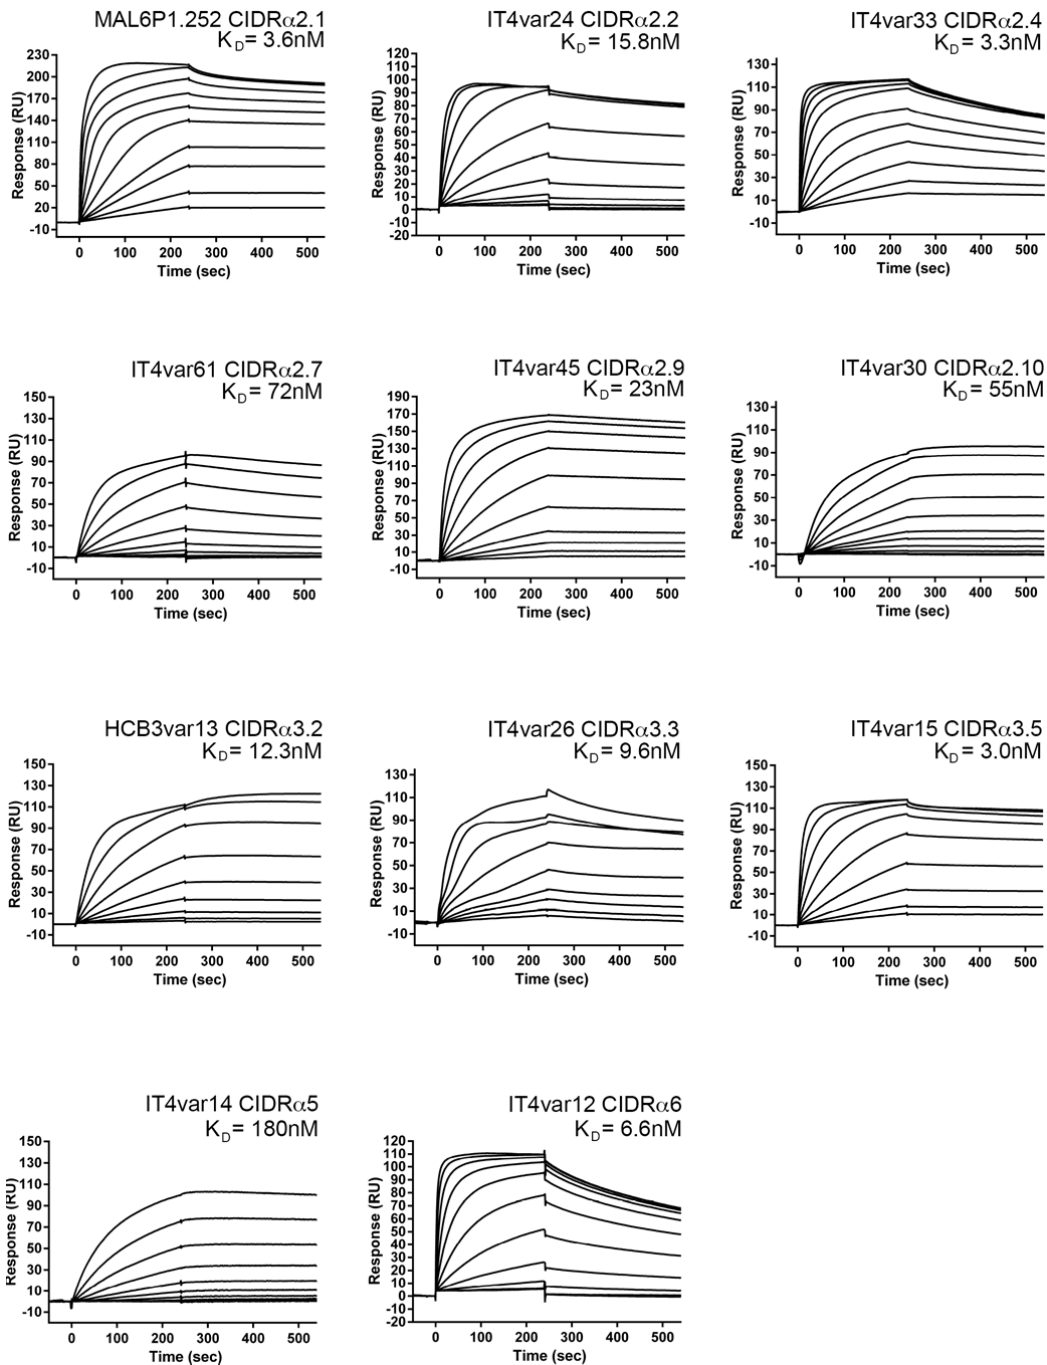

94

95 **Supplementary Figure 9: Analysis of the binding of CIDR $\alpha$ 2-6 variants to**  
 96 **CD36**

97 Surface plasmon analysis of the binding of different CIDR $\alpha$ 2-6 subclasses to  
 98 CD36. Each set of binding curves shows a series of two-fold dilutions from a  
 99 starting concentration of 400nM.

100



101

102

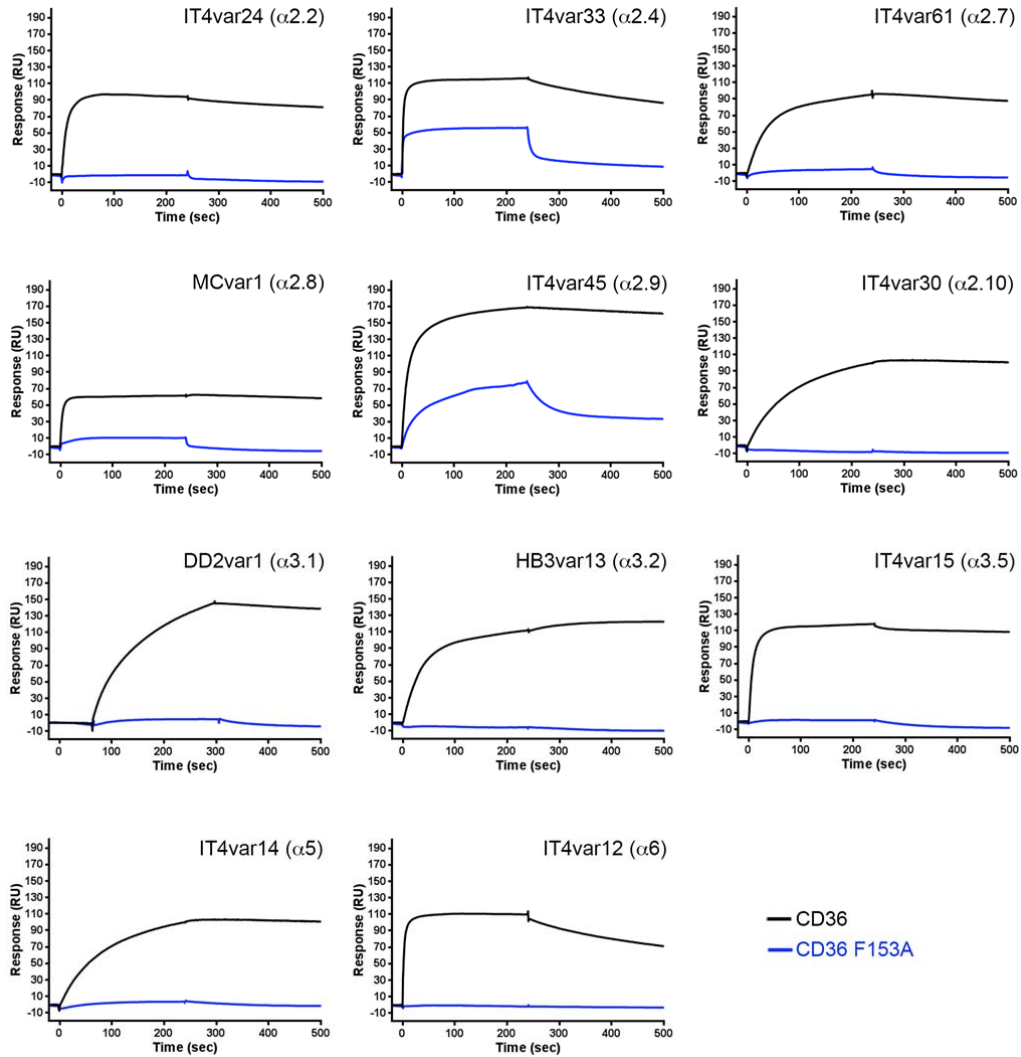

103

104 **Supplementary Figure 10: The effect of the F153A mutation of CD36 on the**  
105 **binding of CIDR $\alpha$ 2-6 variants**

106 Surface plasmon analysis of the binding of equivalent concentrations of different  
107 CIDR $\alpha$ 2-6 subclasses to CD36 (black) and the F153A mutant of CD36 (blue). In  
108 each case, the concentration of CIDR $\alpha$  domain was 400nM.

109

110

111

112 **Supplementary Table 1:** The interactions between CD36 ectodomain with  
 113 CIDR $\alpha$ 2.8  
 114

| CD36    |                | MCvar1:CIDR $\alpha$ 2.8 |               | Interaction   |
|---------|----------------|--------------------------|---------------|---------------|
| Residue | Group          | Residue                  | Group         |               |
| TYR149  | side chain     | PRO652                   | side chain    | Hydrophobic   |
| ASN151  | side chain NH2 | GLN648                   | side chain CO | Hydrogen bond |
| ASN151  | side chain NH2 | ASP650                   | side chain    | Hydrogen bond |
| GLN152  | side chain NH2 | ASN583                   | side chain CO | Hydrogen bond |
| PHE153  | side chain     | TRY582                   | side chain    | Hydrophobic   |
| PHE153  | side chain     | ASN583                   | back bone     | Hydrophobic   |
| PHE153  | side chain     | PHE586                   | side chain    | Hydrophobic   |
| PHE153  | side chain     | TRP587                   | side chain    | Hydrophobic   |
| PHE153  | side chain     | PHE645                   | side chain    | Hydrophobic   |
| PHE153  | side chain     | PHE660                   | side chain    | Hydrophobic   |
| PHE153  | side chain     | LEU664                   | side chain    | Hydrophobic   |
| VAL154  | side chain     | PRO652                   | side chain    | Hydrophobic   |
| VAL154  | side chain     | PHE660                   | side chain    | Hydrophobic   |
| MET156  | side chain     | TRP587                   | side chain    | Hydrophobic   |
| MET156  | side chain     | ILE664                   | side chain    | Hydrophobic   |
| MET156  | side chain     | ILE673                   | side chain    | Hydrophobic   |
| ILE157  | side chain     | TRP655                   | side chain    | Hydrophobic   |
| ILE157  | side chain     | PHE660                   | side chain    | Hydrophobic   |
| ILE157  | side chain     | THR663                   | side chain    | Hydrophobic   |
| ILE157  | side chain     | LEU664                   | side chain    | Hydrophobic   |
| ILE157  | side chain     | LEU669                   | side chain    | Hydrophobic   |
| ASN159  | side chain NH2 | ASP676                   | side chain    | Hydrogen bond |
| SER160  | side chain     | GLU672                   | side chain    | Hydrogen bond |
| PRO191  | backbone O     | TRP655                   | side chain NH | Hydrogen bond |
| TYR192  | side chain     | VAL154                   | side chain    | Hydrophobic   |
| TYR192  | side chain     | TRP655                   | side chain    | Hydrophobic   |
| TYR192  | side chain     | PRO652                   | side chain    | Hydrophobic   |
| PRO193  | side chain     | TRP655                   | back bone     | Hydrophobic   |
| PRO193  | side chain     | ASP654                   | back bone     | Hydrophobic   |
| LYS398  | side chain NH3 | ASN583                   | side chain CO | Hydrogen bond |
| GLN400  | side chain NH2 | ASP676                   | side chain    | Hydrogen bond |

115

116

117

118

119

120 **Supplementary Table 2:** Primers used in cloning

121 Primers for cloning CD36 and MC179var1 CIDR $\alpha$ 2.8:

| CD36 ectodomain(35-439)  |                                         |
|--------------------------|-----------------------------------------|
| Primer 1                 | ctccaccggtcagaagacaattaaagcaag          |
| Primer 2                 | gtgggtaccctattagttattttccagttacttgacttc |
| MCvar1 CIDR $\alpha$ 2.8 |                                         |
| Primer 1                 | ctccaccggtgaggacaagattatgagctac         |
| Primer 2                 | gtgggtacc tgggggcatgtgtc                |

122

123 Primers for mutagenesis:

| CD36_F153A                            |                                          |
|---------------------------------------|------------------------------------------|
| Primer 1                              | catatctatcaaaatcaagccgttcaaatgatc        |
| Primer 2                              | gatcatttgaacggcttgattttgatagatatg        |
| MCvar1 CIDR $\alpha$ 2.8_ F645A       |                                          |
| Primer 1                              | aagatcaaggaccacgccagaaagcagaaggac        |
| Primer 2                              | gtccttctgctttctggcgtggctcttgatctt        |
| MCvar1 CIDR $\alpha$ 2.8_ Q648A       |                                          |
| Primer 1                              | gaccacttcagaaaggccaaggacatccccaag        |
| Primer 2                              | cttggggatgtccttggccttctgaagtggc          |
| MCvar1 CIDR $\alpha$ 2.8_ D650A       |                                          |
| Primer 1                              | ttcagaaagcagaaggccatccccaaggactgg        |
| Primer 2                              | ccagtccttggggatggccttctgctttctgaa        |
| MCvar1 CIDR $\alpha$ 2.8_ L664A       |                                          |
| Primer 1                              | gactttctgcagaccgccctgatgaaggactg         |
| Primer 2                              | caggtccttcatcagggcggctgcagaaagtc         |
| MCvar1 CIDR $\alpha$ 2.8_ E672A       |                                          |
| Primer 1                              | aaggacctgctgctggccatcatccaggacacc        |
| Primer 2                              | ggtgtcctggatgatggccagcagcaggtcctt        |
| MCvar1 CIDR $\alpha$ 2.8_ F660N:Q662T |                                          |
| Primer 1                              | tggaccacgacgacaacctgaccacctgctgatgaag    |
| Primer 2                              | cttcatcagcaggggtggcaggttgcgtcgtgggtcca   |
| MCvar1 CIDR $\alpha$ 2.8_ D680N:N682T |                                          |
| Primer 1                              | caggacacctacggcaacgccaccgagatcaagcggatc  |
| Primer 2                              | gatccgcttgatctcgggtggcgttgccgtaggtgtcctg |

124

125

126

127

128

129

130 **Supplementary Table 3: CIDR domain sequences for recombinant proteins**

131

132 > CIDR $\alpha$ 2.8 MCvar1

133 EDKIMSYNAFFWMVHDMLIDSIKWRDEHGRCINKDKGKTCIKGCNKKCICFQKWVE  
134 QKKTIEWGKIKDHFRKQKDI PKDWTHTDDFLQTLMLKDLLLEIIQDTYGDANEIKRIEA  
135 LLEQAGVGGIDFAALAGLYTKGFVAEKDTTIDKLLQHEQKEADKCLKTHTDDTCCPPQ  
136 EDRSVARS

137

138 >CIDR $\alpha$ 6 IT4var12

139 PWCGLKKQADGTWKRLYENDPQCPIKPKYEPPKGEETPIDVLYTGKENKDIIVKLR  
140 EFCKTDGNTGFKNEEWNCYYQVGNDCVLENGEELGGEKKVKDYDNFLMFWVAHMLK  
141 DSIEWRSKLSNCLKSDKKTCKKCNDCNCKCYEKWIGKKKVEWTQIKKHFDKQTDFFQG  
142 WGRYFVLETVLEGDQFFTDITKAYGDAREIVHIQEMLQKKKEQVLHEDASNMTIID  
143 ELLDHELKEAKQCI VNHKDNNC

144

145 >CIDR $\alpha$ 5 IT4var14

146 PWCGLIEEQKDGKWKRI NDHSACKEEELYTPKENAKYTKINVLTSGEGHEDIAKRLKE  
147 FCTKTQNGGGSDDCGNSDSSLCEPWQCYQPDQLEKVGGEVDDKLGAGGLCIFEF  
148 KMKGEKKVKKQKTFNFFNFVVAHVLDKSIDWRTQLTKLSEDKLKKCEKGCNSNCE  
149 CFKKWIEKKEKEWIKVKDQFNKQTD FLEWKHYLVLETILENYFENIQKAYGDLKSI  
150 QEMKKMIKENKQKNRRTKDDDEDALDVLFDHEKEEAEDCLDIHE

151

152 >CIDR $\alpha$ 2.2 IT4var24

153 PLCGVNGPKGNWTDIEDKECTLVEKKKYDSNNTTNIDILTADKSQKNILQKYNKFCF  
154 NGANDEKSATPTANGGGQIKNWQCYIDESKESGQNNNCILGKWEDFTGNEDVTSYNV  
155 FFYNSIIEMLNDSIEWKDKLNICINNKTGKCRKVKCNPCCECYKRWIEKKTELEKIK  
156 DHFRKQKDIGDAAQREMTLNI TLNNTFLNDIKDAYPVKQQQLQKIEERLKDQMDFI  
157 FERTKTSIDKFLQEEEEQFAEKCI EKHKC

158

159 >CIDR $\alpha$ 2.10 IT4var30

160 PWCGLIEEQKVDGKWKAKNNGECAKVENKIYDPKKTITIEILTGDNEKFGIYEKYNKF  
161 CANGKNGVTS GAPDTAPGKNGNQIVTWQCYDKKRSGQNNDCNVEGTWEKFTGKQT  
162 VKSYNVFFWDVWYHMLHDSLEWRERLNSCINNAKSQNCNKNKCNRECGCFKAWVVK  
163 KDEWDKIKDHFNKQENIGQNVGFIEFNHYGVLEGLDKDELKNIKDTHADAKDIER  
164 IDKMLQQAGVVGGRGGENNTIDKFLQEEERFAKDCQQKQEEC

165

166 >CIDR $\alpha$ 2.4 IT4var33

167 PLCGLGMQEPWNPKKDTCEDRGIKTFDDRNPINLLVKDVTGTSIVEKLGGLCG  
168 NGAKKNIQTWKCRFESSQNYCVLQNDKKNTPQQEIESFNLSLFWHWIEMLKDSIDW  
169 RKEHENCINNNTCKKGCKSKCECFEKWVKRMKEEWKQVLEVYDKQPDFKEVFTPYF  
170 TLGYLLKEYFTKIKAPYEEVESVQEFIKEMEQIIDENSNNINATKENNSITKFLQHE  
171 EGIATECKKTHNEEK

172

173 >CIDR $\alpha$ 2.9 IT4var45

174 PWCNVNGTKGNWTPKNDDCKPGNEYKNYENTQIPIILTGDKTKSEIVERYRKFCKNN  
175 GKNGANGREGGVGGS ENGAASNSDNATTGYCGTNNNDKDP SLCEKWTCYKKEKND  
176 GKKAINFVLDKVGKSQEKSMHYNSFFWDVWYHMLHDSLDWRKQLGRCINKKEET  
177 KCI GSNKCECFKAWVGHKQEQEWEQIKKHFLKQDDIGQETNCDPMVTLEILLDIDE  
178 LLKNIKDTHANADDIDRIQNMLQQAGFDGGVAALVGRCTEGFVAEKDTTIDKFLEKE  
179 LQEAEKCLETHKEKC

180

181 >CIDR $\alpha$ 2.7 IT4var61

182 PWCNVKRNNGGWAKASDGECAKEKTKYKKNITEIPVLTDPDEKHNILQKYENFCFN  
183 SDGNNGDQIKNWQCYEYEEKDESNDNGDSNICVLQENIGKKEEKSMYPHPPFWKWT  
184 EMLIDSMYWRKELKRCINKETKACKNGCKNNDCYKRWVEKKKEWQIKTHFNTQE

185 DMREDIGENTDPGIILAALLNIEDLFENIKDITYGDVKEIKDINQMLEKENEENEGTA  
186 GADSKKKNITIDLMINHEQKDAQKCVTNPNPKDC  
187  
188 >CIDR $\alpha$ 3.2 HB3var13  
189 PLCGVKKEKGTWVRKDSMNDCPRIKLYKPINDKVGTPINFLYSGDGQTEIAEKLKKF  
190 CRTENSGDSSSARANGASGDKNNGSGSQELYQYWKCQYIGDLQKVREGEDDEDDGQ  
191 YDQEVENAGGLCILQKTNGKENVKNQKTSHEIQKTFNPFYFVWVHMLKDSIHWRT  
192 KIKSCINNTNELKACKNNKCNDCDCFKRWVKQKQKEWGQIKVHFKTQDIRGKVVN  
193 GNTVVSFFLDHDELLEGVLDKGLLLESLQEAYGNAEDIKHIKLLQETDVVGGGEHK  
194 TTIDFLLKEELNEAEELKKQKDNK  
195  
196 >CIDR $\alpha$ 3.5 IT4var15  
197 PGCGVELIGNEWKEKNKGECKGGKRYNIPKGTKHNVIPVLSFGDEHKEIEKIEQFC  
198 AESNSDSSKLTQWKCYGDKEYEVCTLENRNKSEEDPEEQKTFHNFYFWRHLL  
199 NDSIEWRDKINNCIEKAKEGKCKNECKTDCGCFQRWIGKKKEEWGEIKKHFKTQDGF  
200 SIFGNNDYFVLENVNLIDELFQDITEAYGNSQKIQGIKDTLAKKKTQAADDATEQKN  
201 TIDLLFEYDSEEAECCKKIQEEC  
202  
203 >CIDR $\alpha$ 2.1 MAL6P1.252  
204 PWCQVVKPGPPWKDNDIDSCGKKEISFSDKDTTDDISILSTDRAKKNILQKLENFCRD  
205 TEHINHDIWKCHYENTDNDNCILQNTGSEKQKIMPFDAFFLWLTQMLDDSI EWR  
206 KKLKTCINNEKPTNCIRGCKKPCFCFERWVEQKEEWEISIEKHFDKQRDI SEEERYI  
207 TLEYILNEFFMDKIEKAYGIEKSKELKEKLSNKGHGIIRDTEHSQDAIKILLEHEL  
208 EDAKKCTETHNDEKC  
209  
210 >CIDR $\alpha$ 3.1 DD2var01  
211 PYCGVKKVNNGGSSNEWEEKNNGKCKSGKLYEPKPKDKEGTTITITILKSGKGHDDIEEK  
212 LNKFCDEKNGDTINSGSGTGGSGGNSGRQELYEEWKCYKGEDVVKVGHDEDDDEED  
213 YENVKNAGGLCILKNQKKNKEEGNTSEKEPDEIQKTFNPFYFVVAHMLKDSIHWK  
214 KKLQRCLQNGNRIKCGNNKCNNDCECFKRWITQKKDEWGKIVQHFKTQNIKGRGGS  
215 NTAELIPFDHDYVLQYNLQEEFLKGDSEDASEEKSENSLDAEEAEELKHLREIIESE  
216 DNNQEASVGGGVTEQKNIMDKLLNYEKDEADLCLEIH  
  
217  
218  
219  
220  
221  
222  
223  
224
